# Supplementary material for: Molecular motion of donor–acceptor catenanes in water
Source: Royal Society of Chemistry journal article supplement (doi:10.1039/c4ob02457e), 2015-01-01
Supplement: c4ob02457e1.pdf [file c4ob02457e1.pdf]

Supporting Information for:

## Molecular motion of Donor-Acceptor catenanes in water

Fabien B. L. Cougnon,\*<sup>a,b</sup> Nandhini Ponnuswamy,\*<sup>a,c</sup> G. Dan Pantoş<sup>d</sup> and Jeremy K. M. Sanders<sup>a</sup>

<sup>a</sup> Department of Chemistry, University of Cambridge, Lensfield road, Cambridge, CB2 1EW, UK;

<sup>b</sup> Current address: Department of Chemistry, Massachusetts Institute of Technology, Cambridge, Massachusetts 02139, USA;

<sup>c</sup> Current address: Dana-Farber Cancer Institute, Harvard University, Cambridge, Massachusetts 02138, USA;

<sup>d</sup> Department of Chemistry, University of Bath, Bath, BA2 7AY, UK.

Email: cougnon@mit.edu; nandhini\_ponnuswamy@dfci.harvard.edu

### 1. 2D exchange spectroscopy (EXSY)

- |                                                                   |       |
|-------------------------------------------------------------------|-------|
| 1.1. Determination of kinetic parameters for catenane <b>1a•6</b> | p. S2 |
| 1.2. Determination of kinetic parameters for catenane <b>1b•6</b> | p. S5 |
| 1.3. Determination of kinetic parameters for catenane <b>2•5</b>  | p. S7 |

### 2. 1D NMR of the previously characterised catenanes

p. S10

### 3. References

p. S13

NMR spectra were recorded on a 500 MHz Bruker cryo-NMR spectrometer.

Nomenclature - NDI: naphthalenedimide; DN: dialkoxynaphthalene.

## 1. 2D exchange spectroscopy (EXSY)

### 1.1. Determination of kinetic parameters for catenane **1a•6**

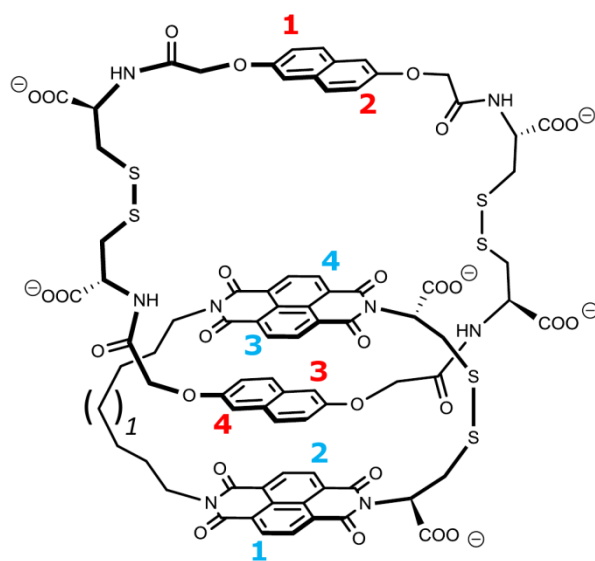

**Fig. S1** Chemical structure of the [2]catenane **1a•6**. The numbers shown in blue depict protons on the acceptor NDI building block and the numbers shown in red depict protons on the donor DN building block.

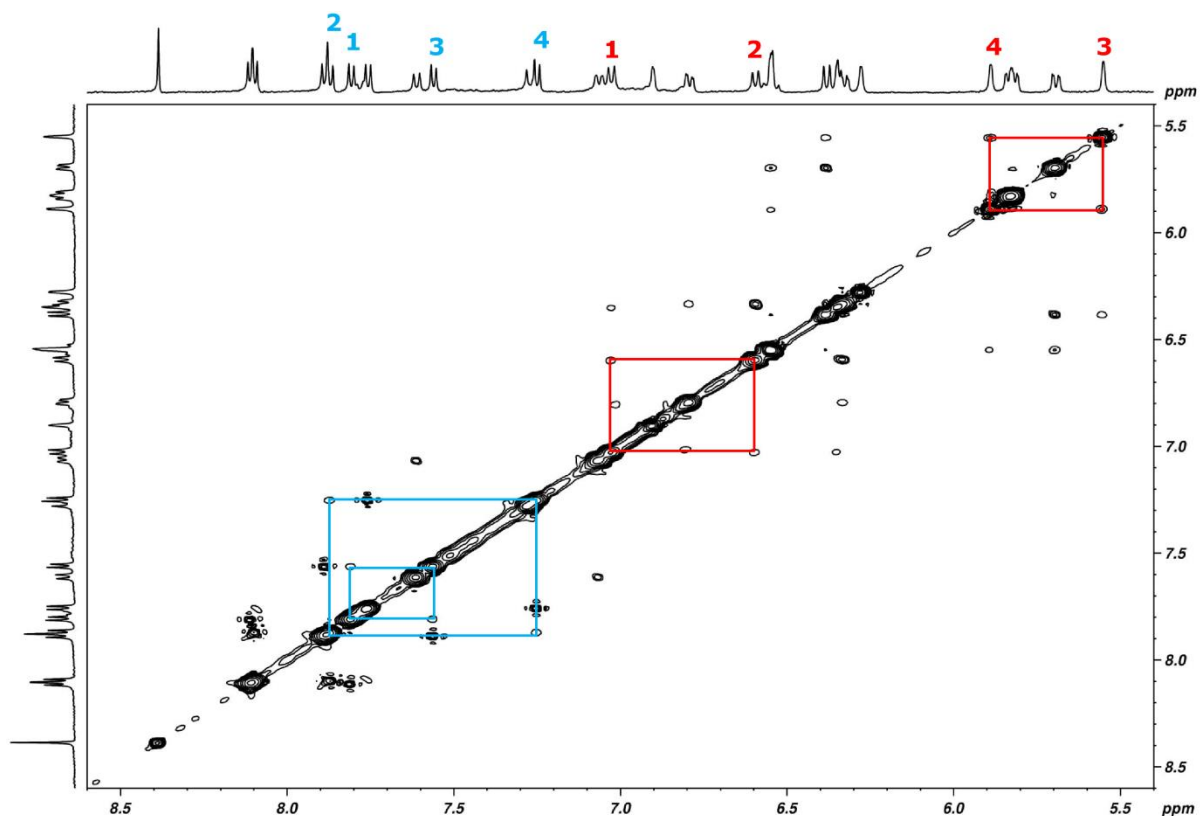

**Fig. S2** Partial 2D NOESY spectrum of the [2]catenane **1a•6** (D<sub>2</sub>O, 298 K, 500 MHz, d8 = 200 ms). The blue and the red boxes correspond to the exchange peaks between the acceptor protons and the donor protons respectively. Full NMR characterisation of this catenane was given in reference 1.

| Temperature (T) | Rate constant (k) | ln (k/T) | 1/T     |
|-----------------|-------------------|----------|---------|
| 298.1           | 0.19              | -7.38    | 0.00335 |
| 308.1           | 0.50              | -6.43    | 0.00325 |
| 317.1           | 1.03              | -5.73    | 0.00315 |

**Table S1** Rate constant of the motion observed for catenanes **1a•6** at different temperatures obtained from 2D EXSY in D<sub>2</sub>O. Rate constants were calculated using the software EXSYCalc developed by Mestrelab research.

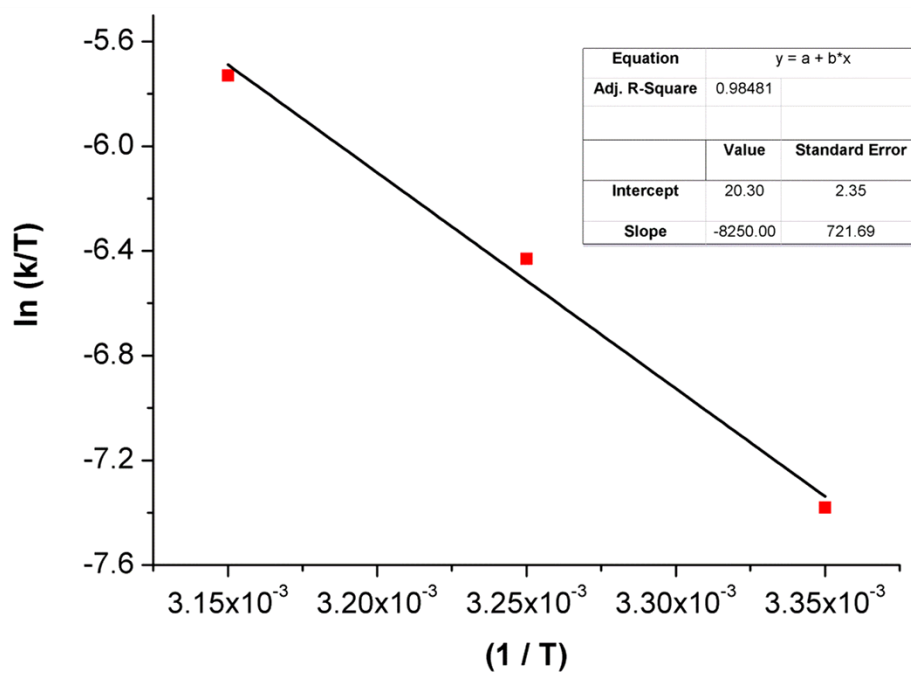

**Fig. S3** A plot of  $\ln(k/T)$  vs.  $(1/T)$  for the [2]catenane **1a•6**

|                                  |          |         |   |       |          |
|----------------------------------|----------|---------|---|-------|----------|
| $\Delta H^\ddagger$              | 68597.98 | J/mol   | = | 16.38 | kcal/mol |
| $\Delta S^\ddagger$              | -28.67   | J/mol K |   |       |          |
| $\Delta G^\ddagger$ (at 298.1 K) | 77145.88 | J/mol   | = | 18.43 | kcal/mol |

**Table S2** Kinetic parameters of the motion observed for catenanes **1a•6** obtained from Eyring equation.

## 1.2. Determination of kinetic parameters for catenane **1b•6**

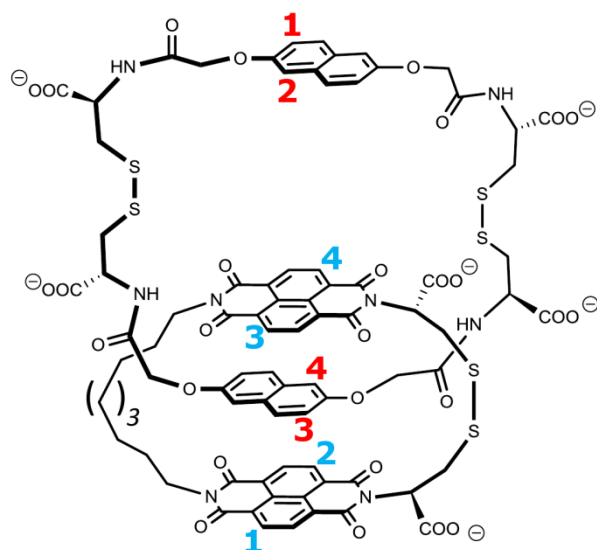

**Fig. S4** Chemical structure of the [2]catenane **1b•6**. The numbers shown in blue depict protons on the acceptor NDI building block and the numbers shown in red depict protons on the donor DN building block.

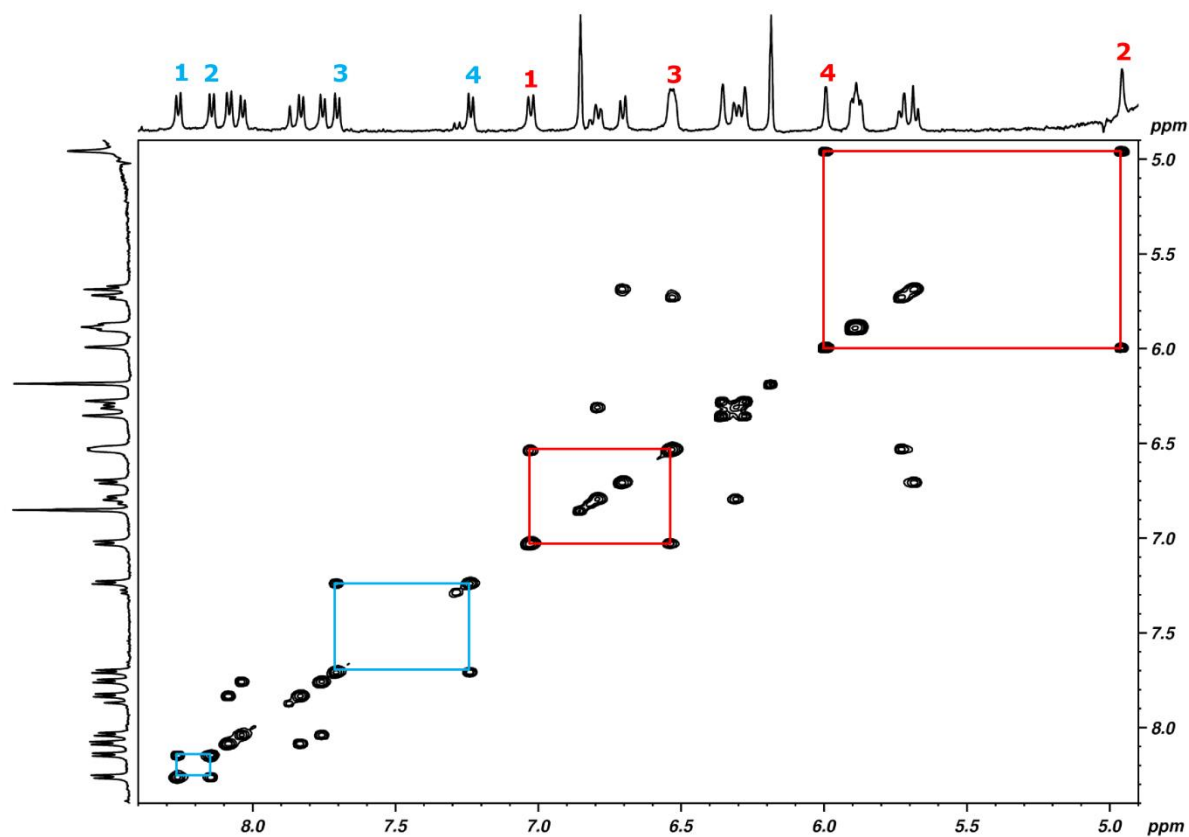

**Fig. S5** Partial 2D NOESY spectrum of the [2]catenane **1b•6** ( $D_2O$ , 298 K, 500 MHz,  $d_8 = 200$  ms). The blue and the red boxes correspond to the exchange peaks between the acceptor protons and donor protons respectively. Full NMR characterisation of this catenane was given in reference 1.

| Temperature (T) | Rate constant (k) | ln (k/T) | 1/T     |
|-----------------|-------------------|----------|---------|
| 288.1           | 1.59              | -5.20    | 0.00347 |
| 298.1           | 5.30              | -4.03    | 0.00335 |
| 308.1           | 11.21             | -3.31    | 0.00325 |

**Table S3** Rate constant of the motion observed for catenanes **1b•6** at different temperatures obtained from 2D EXSY in D<sub>2</sub>O. Rate constants were calculated using the software EXSYCalc developed by Mestrelab research.

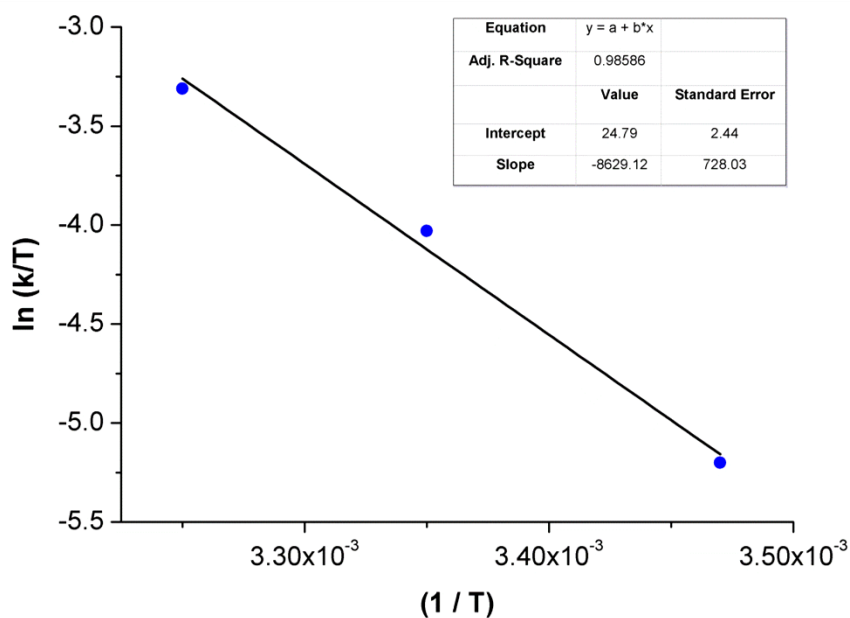

**Fig. S6** A plot of ln(k/T) vs. (1/T) for the [2]catenane **1b•6**

|                                  |          |         |   |       |          |
|----------------------------------|----------|---------|---|-------|----------|
| $\Delta H^\ddagger$              | 69751.13 | J/mol   | = | 16.66 | kcal/mol |
| $\Delta S^\ddagger$              | 1.86     | J/mol K |   |       |          |
| $\Delta G^\ddagger$ (at 298.1 K) | 69195.86 | J/mol   | = | 16.53 | kcal/mol |

**Table S4** Kinetic parameters of the motion observed for catenanes **1b•6** obtained from Eyring equation.

### 1.3. Determination of kinetic parameters for catenane **2•5**

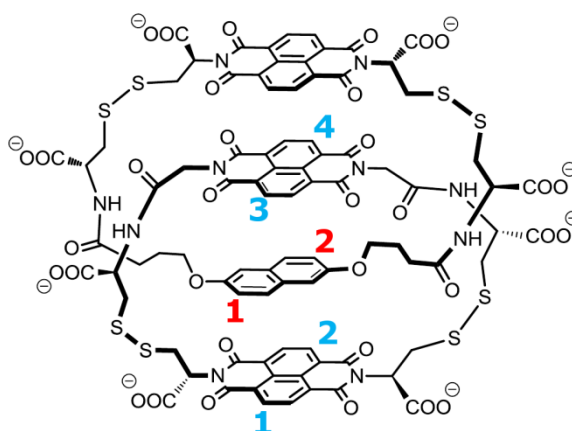

**Fig. S7** Chemical structure of the [2]catenane **2•5**. The numbers shown in blue depict protons on the acceptor NDI building block and the numbers shown in red depict protons on the donor DN building block.

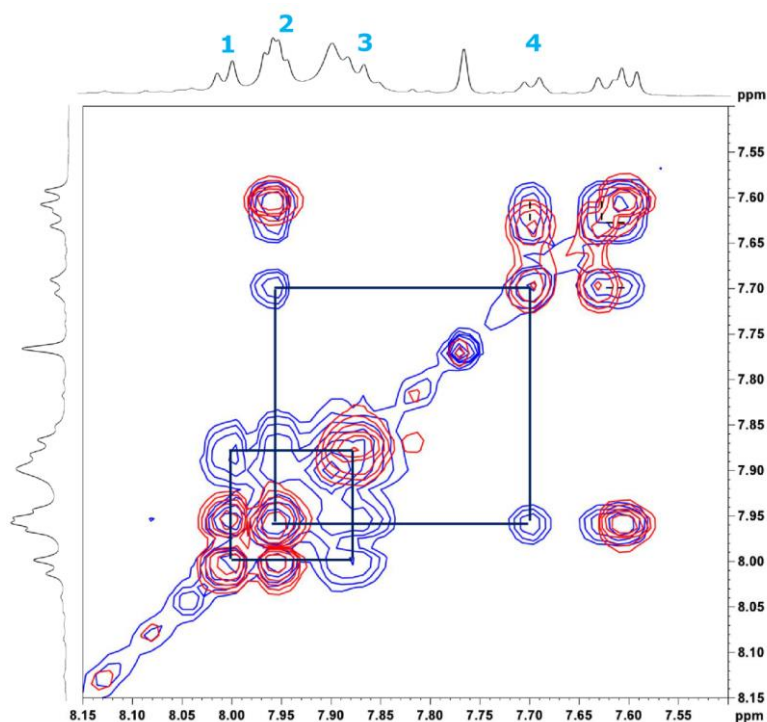

**Fig. S8** Partial 2D NOESY spectrum of the [2]catenane **2•5** depicting the acceptor NDI region ( $D_2O$ , 298 K, 500 MHz,  $d_8 = 800$  ms). 2D COSY spectrum is overlaid and is coloured in red. The solid boxes correspond to the exchange peaks between the acceptor protons. Full NMR characterisation of this catenane was given in reference 2.

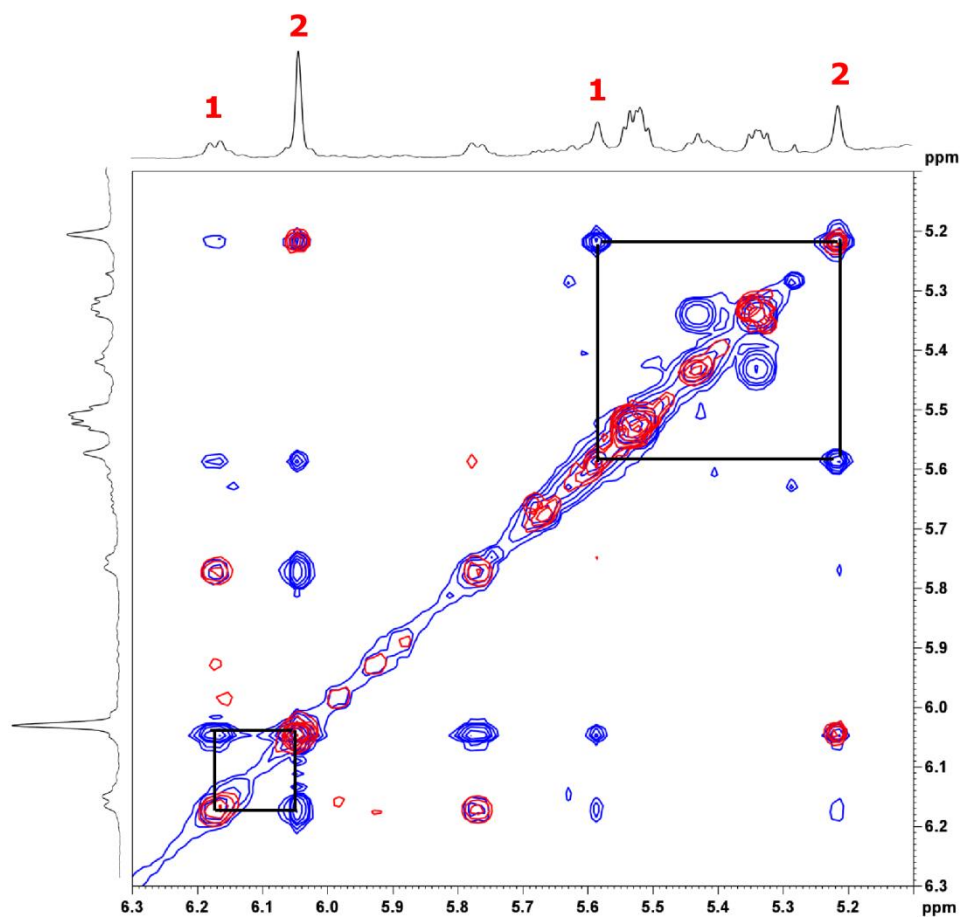

**Fig. S9** Partial 2D NOESY spectrum of the [2]catenane **2•5** depicting the donor DN region ( $D_2O$ , 298 K, 500 MHz,  $d_8 = 800$  ms). 2D COSY spectrum is overlaid and is coloured in red. The black boxes correspond to the exchange peaks between the donor protons.



| Temperature (T) | Rate constant (k) | ln (k/T) | 1/T     |
|-----------------|-------------------|----------|---------|
| 288.1           | 0.58              | -6.21    | 0.00347 |
| 298.1           | 2.21              | -4.91    | 0.00335 |
| 308.1           | 6.74              | -3.82    | 0.00325 |

**Table S5** Rate constant of the motion observed for catenanes **2•5** at different temperatures obtained from 2D EXSY in D<sub>2</sub>O. Rate constants were calculated using the software EXSYCalc developed by Mestrelab research.

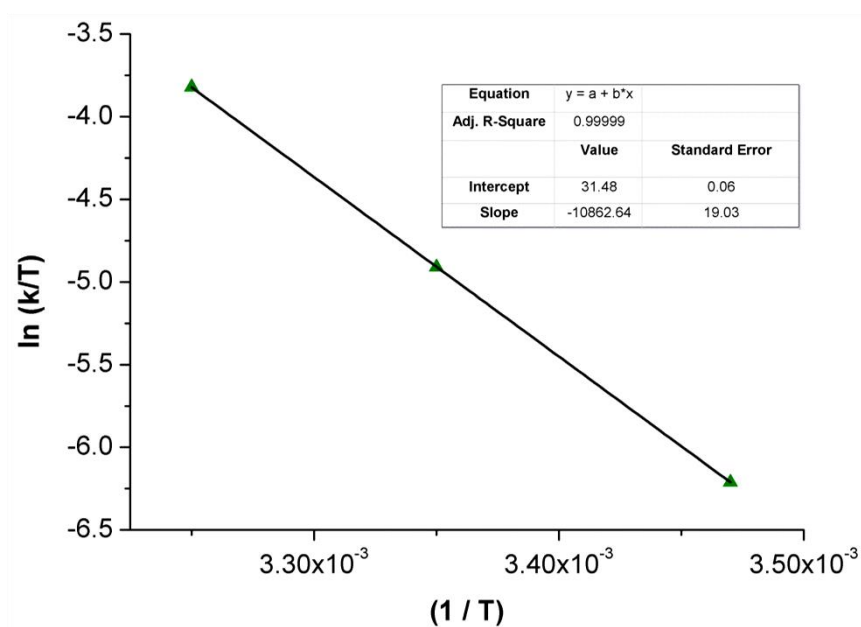

**Fig. S10** A plot of ln(k/T) vs. (1/T) for the [2]catenane **2•5**

|                                  |          |         |   |       |          |
|----------------------------------|----------|---------|---|-------|----------|
| $\Delta H^\ddagger$              | 88078.52 | J/mol   | = | 21.04 | kcal/mol |
| $\Delta S^\ddagger$              | 56.74    | J/mol K |   |       |          |
| $\Delta G^\ddagger$ (at 298.1 K) | 71163.30 | J/mol   | = | 17.00 | kcal/mol |

**Table S6** Kinetic parameters of the motion observed for catenanes **2•5** obtained from Eyring equation.

## 2. 1D NMR of the previously characterised catenanes

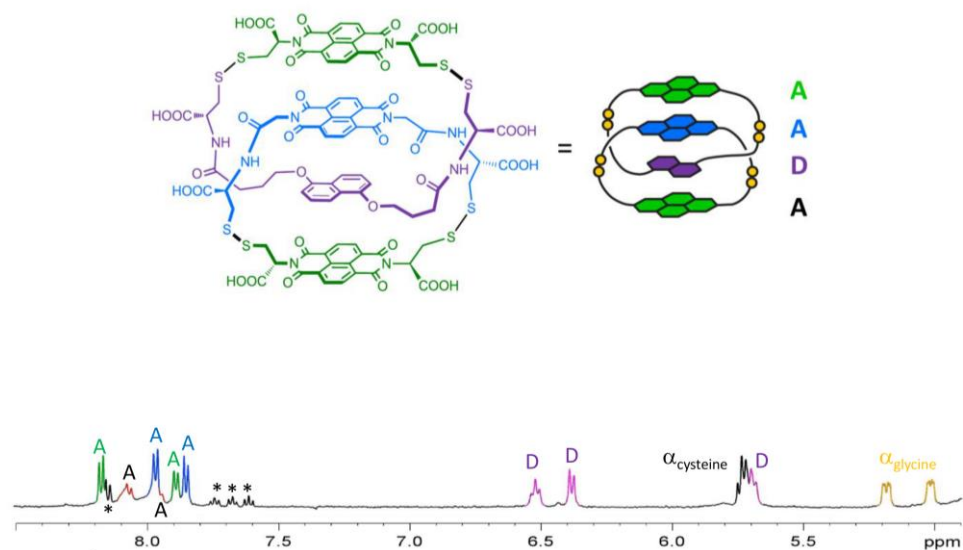

**Fig. S11** Partial  $^1\text{H}$  NMR spectrum ( $\text{D}_2\text{O}$ , 500 MHz) of catenane **2•4** at 298 K, showing the presence of a single conformation. An impurity was labelled by \*, and the water peak was referenced at 4.79 ppm. Full NMR characterisation of this catenane was given in reference 2.

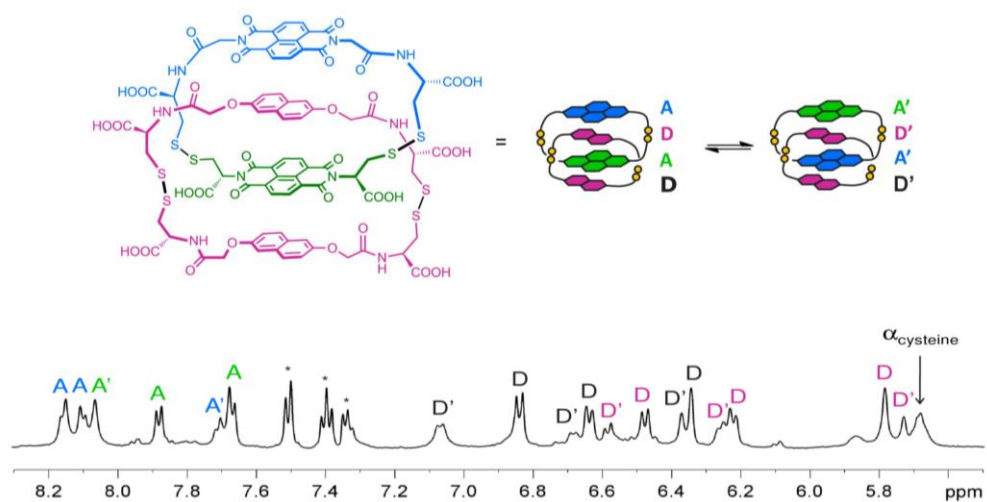

**Fig. S12** Partial  $^1\text{H}$  NMR spectrum ( $\text{D}_2\text{O}$ , 500 MHz) of catenane **2•6** at 298 K, showing the presence of two conformations. An impurity was labelled by \*, and the water peak was referenced at 4.79 ppm. Full NMR characterisation of this catenane was given in reference 2.

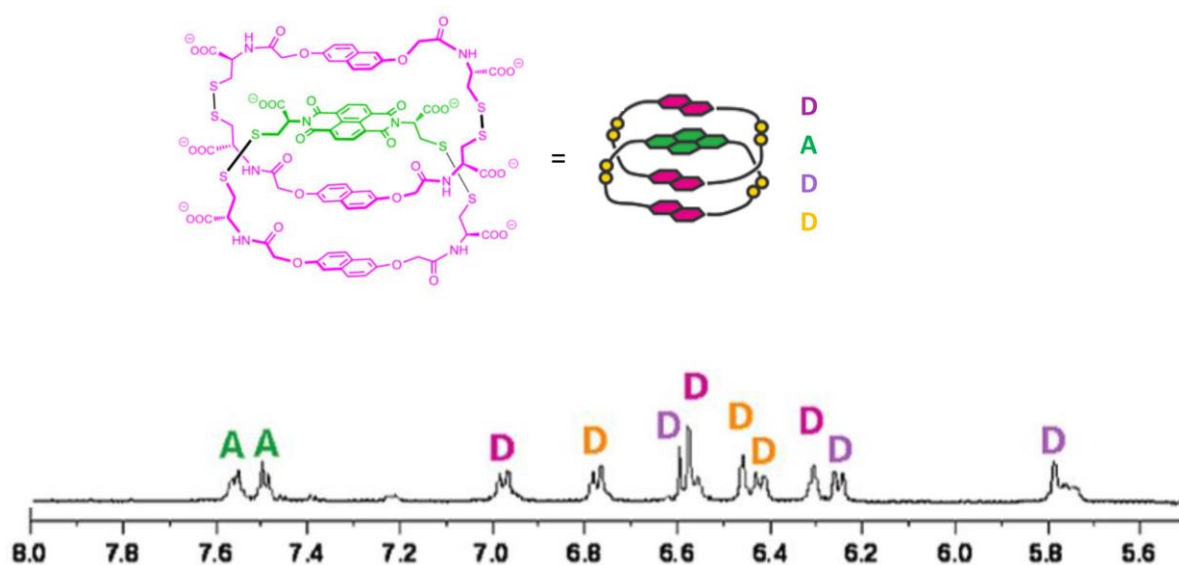

**Fig. S13** Partial  $^1\text{H}$  NMR spectrum ( $\text{D}_2\text{O}$ , 500 MHz) of catenane **3•6** at 300 K, showing the presence of a single conformation. Full NMR characterisation of this catenane was given in reference 3. The water peak was referenced at 4.79 ppm.

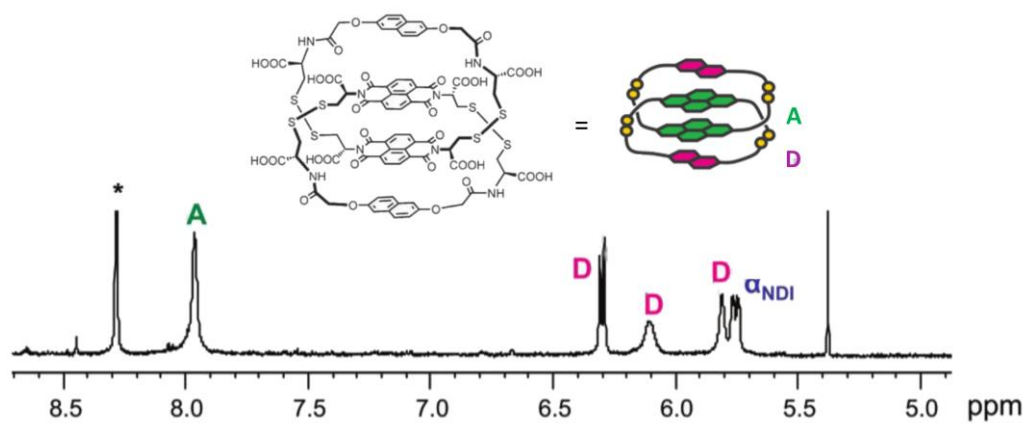

**Fig. S14** Partial  $^1\text{H}$  NMR spectrum ( $\text{D}_2\text{O}$ , 500 MHz) of catenane **3•3** at 300 K, showing the presence of a single conformation. Full NMR characterisation of this catenane was given in reference 3. The water peak was referenced at 4.79 ppm.

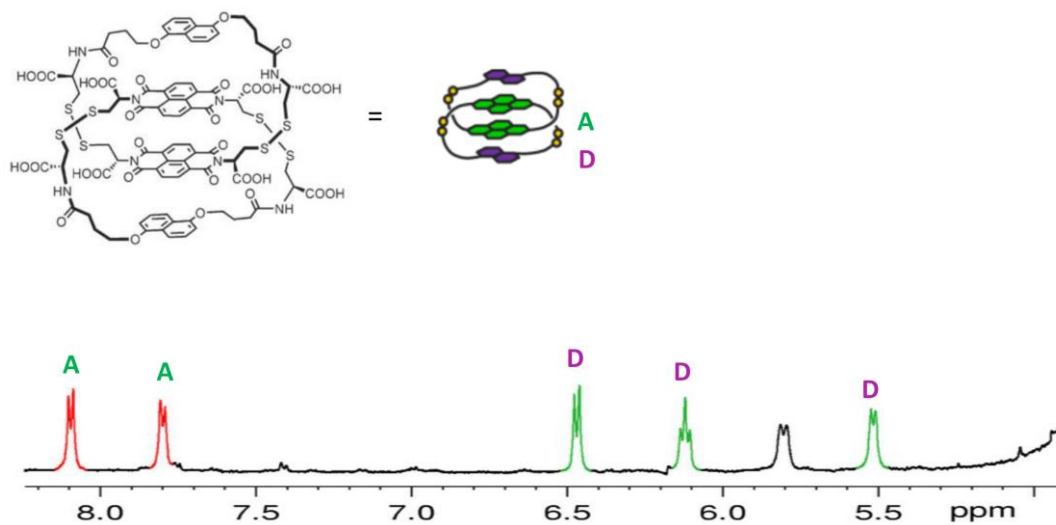

**Fig. S15** Partial  $^1\text{H}$  NMR spectrum ( $\text{D}_2\text{O}$ , 500 MHz) of catenane **4•4** at 300 K, showing the presence of a single conformation. Full NMR characterisation of this catenane was given in reference 4. TFA was labelled by \* and the water peak was referenced at 4.79 ppm.

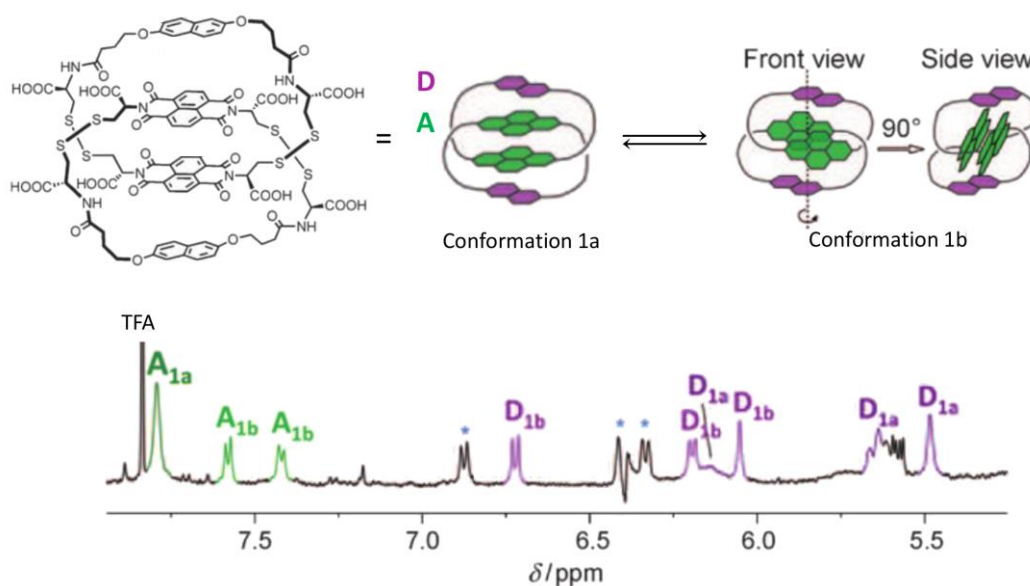

**Fig. S16** Partial  $^1\text{H}$  NMR spectrum ( $\text{D}_2\text{O}$ , 500 MHz) of catenane **5•5** at 300 K, showing the presence of two conformations, assigned as a fully stacked (1a) and a Gemini-like (1b) conformations. Full NMR characterisation of this catenane was given in reference 5. An impurity was labelled by \*

### 3. References

- (1) F. B. L. Cougnon, N. Ponnuswamy, N. A. Jenkins, G. D. Pantoş and J. K. M. Sanders, *J. Am. Chem. Soc.*, 2012, **134**, 19129.
- (2) F. B. L. Cougnon, H. Y. Au-Yeung, G. D. Pantoş and J. K. M. Sanders, *J. Am. Chem. Soc.*, 2011, **133**, 3198.
- (3) H. Y. Au-Yeung, G. D. Pantoş and J. K. M. Sanders, *J. Am. Chem. Soc.*, 2009, **131**, 16030.
- (4) H. Y. Au-Yeung, G. D. Pantoş and J. K. M. Sanders, *Proc. Natl. Acad. Sci. USA.*, 2009, **106**, 10466.
- (5) H. Y. Au-Yeung, G. D. Pantoş and J. K. M. Sanders, *Angew. Chem. Int. Ed.*, 2010, **49**, 5331.
